# Supplementary material for: Discrete Virus Factories Form in the Cytoplasm of Cells Coinfected with Two Replication-Competent Tagged Reporter Birnaviruses That Subsequently Coalesce over Time
Source: PubMed Central journal article supplement (PMC7307154; doi:10.1128/jvi.02107-19), 2020-06-16
Supplement: JVI.02107-19-s0001.pdf [file JVI.02107-19-s0001.pdf]

## Movie legends

**Movie S1. VFs coalesce in the cytoplasm of infected cells between 16 and 18 hpi.** DF-1 cells were transfected with a plasmid expressing GFP1-10 and infected 24 hours post-transfection with the PBG98-VP1-GFP11 virus at an MOI of 1. One live infected cell was imaged from 16-18 hpi; one image obtained every 4 minutes.

**Movie S2. VFs coalesce in the cytoplasm of infected cells between 22 and 25 hpi.** DF-1 cells were transfected with a plasmid expressing GFP1-10 and infected 24 hours post-transfection with the PBG98-VP1-GFP11 virus at an MOI of 1. One live infected cell was imaged from 22-25 hpi; one image obtained every 4 minutes.

**Movie S3. VF coalescence is dependent on an intact microtubule network.** DF-1 cells were transfected with a plasmid expressing GFP1-10 and infected 24 hours post-transfection with the PBG98-VP1-GFP11 virus at an MOI of 1. Cells were treated with nocodazole from 2 hpi. One live infected cell was imaged from 20-22 hpi; one image obtained every 4 minutes.

**Movie S4. VF coalescence is dependent on an intact actin cytoskeleton.** DF-1 cells were transfected with a plasmid expressing GFP1-10 and infected 24 hours post-transfection with the PBG98-VP1-GFP11 virus at an MOI of 1. Cells were treated with cytochalasin-D from 2 hpi. One live infected cell was imaged from 20-22 hpi; one image obtained every 4 minutes.
